# Supplementary material for: Characteristics and mixing state of amine-containing particles at a rural site in the Pearl River Delta, China
Source: Copernicus journal article supplement (doi:10.5194/acp-2018-53), 2018-01-30
Supplement: Supplementary file 1 [file acp-2018-53-supplement.pdf]

## **Supplementary materials**

### **Table list:**

Table S1. Marker ions used to classify the major groups of amine-containing particles in this work.

### **Figure captions:**

Figure S1. The location of the SPAMS measurements at the Heshan sampling site (22.73° N, 112.93° E) in the PRD, China.

Figure S2. Linear regressions between amine-containing particle number count and ambient relative humidity (RH) in summer and winter in Heshan.

Figure S3. Backward trajectories (48 h) of air masses at 500 m above ground level clustered during the following sampling periods: summer (from 18 July to 1 August 2014) and winter (from 27 January to 8 February 2015).

Table S1. Marker ions used to classify the major groups of amine-containing particles in this work.

| Species                             | $m/z$    | Marker Ion               | Area | Relative Area | Function |
|-------------------------------------|----------|--------------------------|------|---------------|----------|
| Elemental and organic carbon (ECOC) | $\pm 12$ | $[C]^\pm$                | 50   | 0.005         | or       |
|                                     | $\pm 24$ | $[C_2]^\pm$              | 50   | 0.005         | or       |
|                                     | $\pm 36$ | $[C_3]^\pm$              | 50   | 0.005         | and      |
|                                     | 37       | $[C_3H]^+$               | 50   | 0.005         | and      |
|                                     | 43       | $[C_3H_7]^+/[C_2H_3O]^+$ | 50   | 0.005         | and      |
| Biomass Burning (BB)                | 39       | $[K]^+$                  | 1500 | 0.3           | and      |
|                                     | 113,115  | $[K_2Cl]^+$              | 50   | 0.005         | or       |
|                                     | 213      | $[K_3SO_4]^+$            | 50   | 0.005         | or       |
|                                     | -26      | $[CN]^-$                 | 50   | 0.005         | or       |
|                                     | -59      | $[C_2H_3O_2]^-$          | 50   | 0.005         | and      |
|                                     | -73      | $[C_3H_3O_2]^-$          | 50   | 0.005         | and      |
| Nitrate-rich                        | -46      | $[NO_2]^-$               | 1000 | 0.1           | and      |
|                                     | -62      | $[NO_3]^-$               | 1000 | 0.1           | and      |
| Ammonium                            | 18       | $[NH_4]^+$               | 50   | 0.005         |          |
| Nitrate                             | -46      | $[NO_2]^-$               | 100  | 0.05          | or       |
|                                     | -62      | $[NO_3]^-$               | 100  | 0.05          | or       |
| Sulfate                             | -80      | $[SO_3]^-$               | 100  | 0.05          | or       |
|                                     | -97      | $[HSO_4]^-$              | 100  | 0.05          | or       |

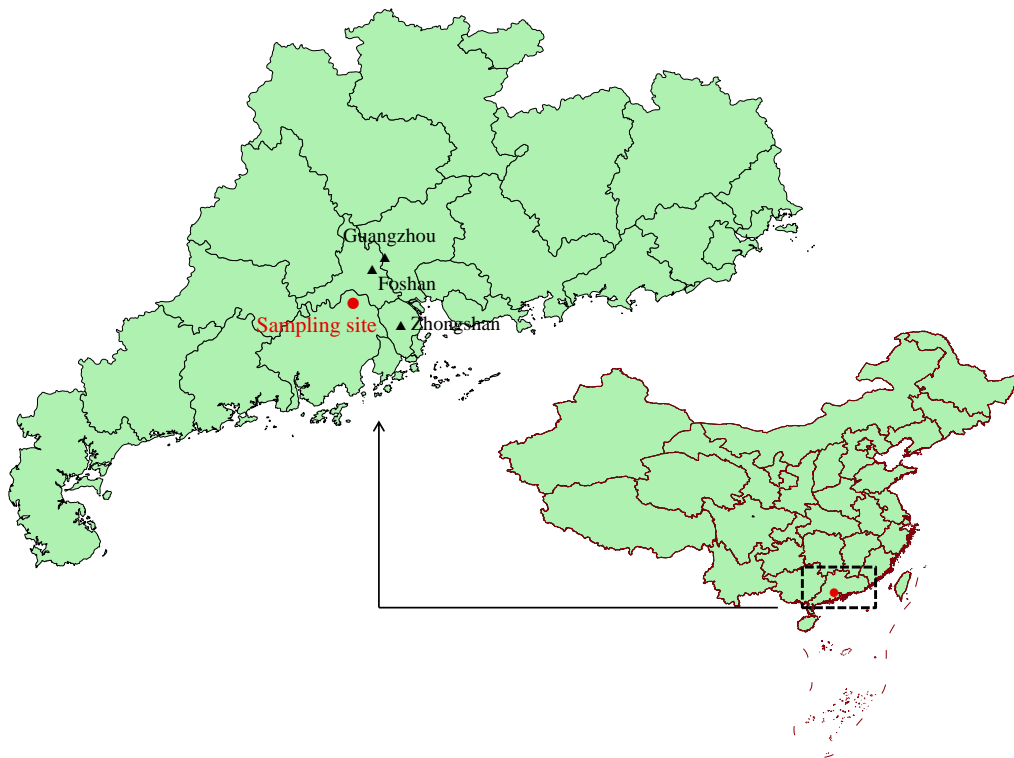

Figure S1. The location of the SPAMS measurements at the Heshan sampling site (22.73° N, 112.93° E) in the PRD, China.

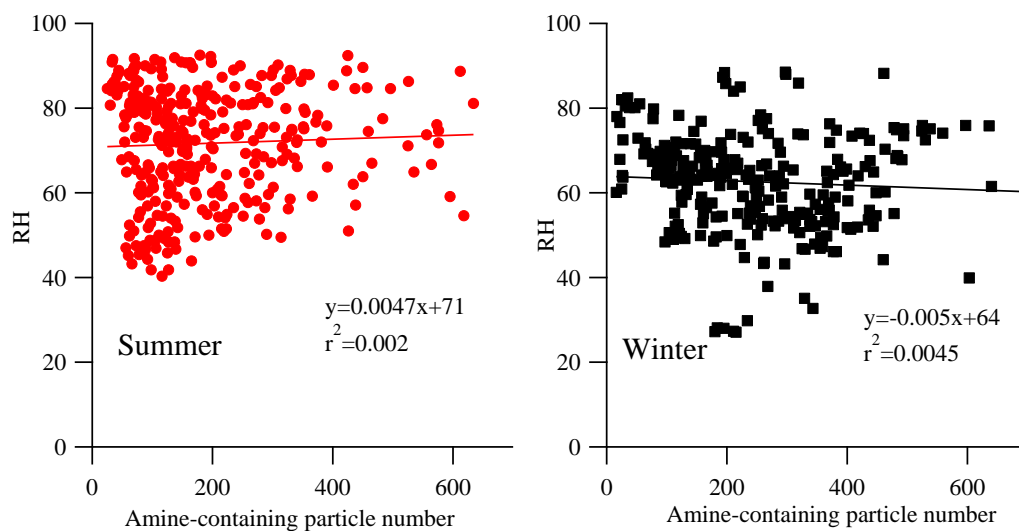

Figure S2. Linear regressions between amine-containing particle number count and ambient relative humidity (RH) in summer and winter in Heshan.

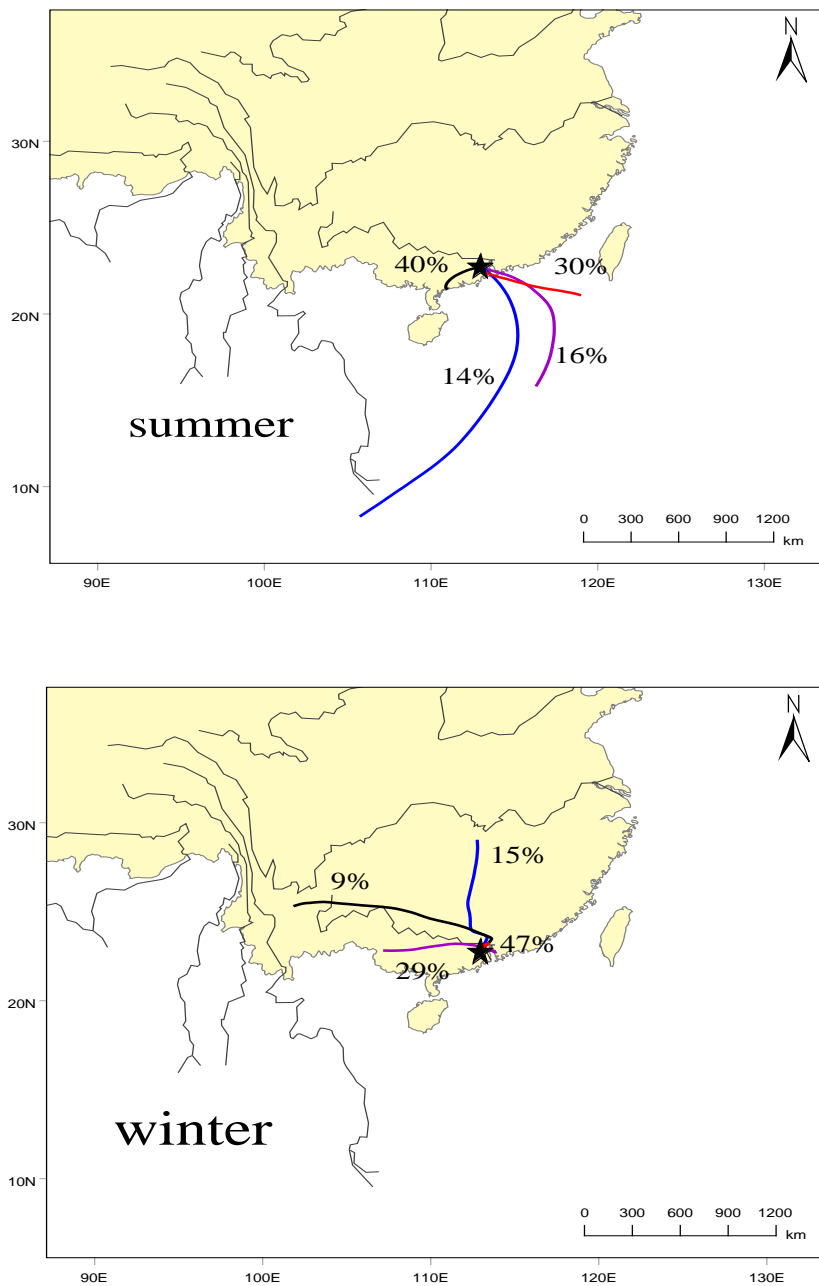

Figure S3. Backward trajectories (48 h) of air masses at 500 m above ground level clustered during the following sampling periods: summer (from 18 July to 1 August 2014) and winter (from 27 January to 8 February 2015).
